# Supplementary material for: Enriching the American Heart Association COVID‐19 Cardiovascular Disease Registry Through Linkage With External Data Sources: Rationale and Design
Source: PubMed Central journal article supplement — J Am Heart Assoc. 2022 Sep 14;11(18):e7743. doi: 10.1161/JAHA.122.027094 (PMC9683646; doi:10.1161/jaha.122.027094), 2022-09-14
Supplement: JAH3-11-00e7743-s001.pdf [file JAH3-11-00e7743-s001.pdf]

## **SUPPLEMENTAL MATERIAL**

## **Data S1. Supplemental Methods**

### ***Calculating and Interpreting Absolute Standardized Differences***

The absolute standardized difference (ASD) is calculated by taking the difference in means of a covariate across treatment groups and then dividing that difference by the combined standard deviation of both groups ( $[\text{mean group 1}] - [\text{mean group 2}] / \text{standard deviation}$ ). In general, absolute standardized differences of  $\leq 0.1$  are considered to represent differences of small magnitude.

**Table S1. Baseline characteristics of linked versus unlinked American Heart Association Registry participants**

|                                                                     | Linked patients<br>n = 10,009 | Unlinked patients<br>n = 11,308 | Absolute Standardized Difference* |
|---------------------------------------------------------------------|-------------------------------|---------------------------------|-----------------------------------|
| <b>Patient-level sociodemographic characteristics</b>               |                               |                                 |                                   |
| Age (year), Mean (SD)                                               | 78.0 (8.5)                    | 76.5 (8.1)                      | 0.17                              |
| Female, N (%)                                                       | 4,837 (48.3)                  | 5450 (48.2)                     | <0.01                             |
| Race, N (%) <sup>†</sup>                                            |                               |                                 | 0.26                              |
| White                                                               | 7,546 (75.4)                  | 7,242 (64.0)                    | 0.25                              |
| Black                                                               | 1,436 (14.3)                  | 2,400 (21.2)                    | 0.18                              |
| Other                                                               | 1,027 (10.3)                  | 1,666 (14.7)                    | 0.14                              |
| Region, N (%) <sup>†,‡</sup>                                        |                               |                                 | 0.14                              |
| Midwest                                                             | 1,822 (18.2)                  | 1,752 (15.5)                    | 0.07                              |
| Northeast                                                           | 3,591 (35.9)                  | 4,830 (42.7)                    | 0.14                              |
| South                                                               | 3,492 (34.9)                  | 3,614 (32.0)                    | 0.06                              |
| West                                                                | 1103 (11.0)                   | 1,111 (9.8)                     | 0.04                              |
| Chronic comorbidities, N (%)                                        |                               |                                 |                                   |
| Hypertension                                                        | 7,725 (77.2)                  | 8,791 (77.7)                    | 0.01                              |
| Diabetes                                                            | 3,925 (3.2)                   | 4,933 (43.6)                    | 0.01                              |
| Heart failure                                                       | 2,079 (20.8)                  | 2,118 (18.7)                    | 0.05                              |
| Myocardial infarction                                               | 1,028 (10.3)                  | 1,072 (9.5)                     | 0.03                              |
| Peripheral arterial disease                                         | 490 (4.9)                     | 529 (4.7)                       | 0.01                              |
| Stroke/TIA                                                          | 1,668 (16.7)                  | 1,610 (14.2)                    | 0.07                              |
| Smoking                                                             | 614 (6.1)                     | 760 (6.7)                       | 0.02                              |
| Chronic kidney disease                                              | 2,071 (20.7)                  | 2,172 (19.2)                    | 0.04                              |
| COPD                                                                | 1,689 (16.9)                  | 1,858 (16.4)                    | 0.01                              |
| Asthma                                                              | 761 (7.6)                     | 901 (8.0)                       | 0.01                              |
| <b>Community-level sociodemographic characteristics<sup>§</sup></b> |                               |                                 |                                   |
| RUCA, N (%) <sup>†</sup>                                            |                               |                                 | 0.14                              |
| Metro                                                               | 8,442 (84.5)                  | 10,018 (88.8)                   | 0.13                              |
| Micro                                                               | 683 (6.8)                     | 560 (5.0)                       | 0.08                              |
| Small-town/rural                                                    | 868 (8.7)                     | 699 (6.2)                       | 0.09                              |

\*Absolute standardized difference (ASD) is calculated by taking the difference in means of a covariate across treatment groups, divided by the combined standard deviation of both groups. Multivariate Mahalanobis distance was used for multinomial variables.

<sup>†</sup> Categorical variables may not sum to 1 due to rounding

<sup>‡</sup> Puerto Rico and Guam (0.13%) were excluded for the region variable

<sup>§</sup> Based on beneficiary ZIP code

## Figure S1. Sample SAS Code for Linkage of AHA COVID-19 Cardiovascular Disease Registry with External Data

```

/*****
/** Link dataset X and Y**/
/** Dataset X is the smaller one **/
/** *_ID: the ID variable in data X/Y**/
/** adate_*: the admission date in X/Y **/
/** ddate_*: the discharge date in X/Y **/
/** bdate_*: the birth date in X/Y **/
/** bday_*,bmonth_*,byear_*: 3 elements (day, month, year) of the
birth date in X/Y **/
/** prov_num: provider number (hospital ID)**/
/** No missing of these variables in X or Y**/
*****/

/*-----
Step 1 all 7 factors
-----*/;

proc sql noprint;
create table temp as select a.*,b.*
from x as a
left join Y as b
on compress(a.prov_num) = compress(b.prov_num) and
   a.gender = b.gender and
   a.adate_x= b.adate_y and
   a.bdate_x= b.bdate_y and
   a.ddate_x= b.ddate_y and
   a.zip_x= b.zip_y and
   a.race_x = b.race_y
;
quit;

data matched1;
set TEMP;
where missing(Y_ID) = 0 ;
length Matched $120.;
matched = '1 all factors' ;
drop adate_x bdate_x ddate_x zip_x race_x
      bday_x bday_y
      bmonth_x bmonth_y
      byear_x byear_y ;
run;

data matched;
set matched1 ;
run;
```

```

/*-----
Step #2 without race
-----*/

proc sql noprint;
create table finder_x as select distinct * from x where X_ID not in
(select X_ID from matched);
create table master as select distinct * from Y where Y_ID not in
(select Y_ID from matched);

create table TEMP as select a.*, b.*
from finder_x as a
left join master as b
on a.prov_num = b.prov_num and
   a.gender = b.gender and
   a.adata_x= b.adata_y and
   a.bdate_x= b.bdate_y and
   a.ddate_x= b.ddate_y and
   a.zip_x= b.zip_y
;
quit;

data matched2;
set TEMP;
where missing(Y_ID) = 0 ;
length Matched $120.;
matched = '2 wo race' ;
drop adata_x bdate_x ddate_x zip_x race_x
      bday_x bday_y
      bmonth_x bmonth_y
      byear_x byear_y ;
run;

data matched;
set matched1 matched2 ;
run;

/*-----
Step #3 without zipcode
-----*/

proc sql noprint;
create table finder_x as select distinct * from x where X_ID not in
(select X_ID from matched);
create table master as select distinct * from Y where Y_ID not in
(select Y_ID from matched);

create table TEMP as select a.*, b.*
from finder_x as a
left join master as b
on a.prov_num = b.prov_num and

```

```

a.gender = b.gender and
a.adate_x= b.adate_y and
a.bdate_x= b.bdate_y and
a.ddate_x= b.ddate_y and
a.race_x = b.race_y
;
quit;

data matched3;
set TEMP;
where missing(Y_ID) = 0 ;
length Matched $120.;
matched = '3 wo zip' ;
drop adate_x bdate_x ddate_x zip_x race_x
      bday_x bday_y
      bmonth_x bmonth_y
      byear_x byear_y ;
run;

data matched;
set matched1 matched2 matched3 ;
run;

/*-----
Step #4 open an 1-day window for dates of admission and discharge
-----*/
proc sql noprint;
create table finder_x as select distinct * from x where X_ID not in
(select X_ID from matched);
create table master as select distinct * from Y where Y_ID not in
(select Y_ID from matched);

create table TEMP as select a.*, b.*
from finder_x as a
left join master as b
on a.prov_num = b.prov_num and
a.gender = b.gender and
abs(a.adate_x - b.adate_y) < 2 and
abs(a.ddate_x - b.ddate_y) < 2 and
a.bdate_x= b.bdate_y and
a.race_x = b.race_y and
a.zip_x= b.zip_y
;
quit;

data matched4;
set TEMP;
where missing(Y_ID) = 0 ;
length Matched $120.;
matched = '4 7 factor with 1d win for a/d date' ;

```

```

drop adate_x bdate_x ddate_x zip_x race_x
    bday_x bday_y
        bmonth_x bmonth_y
            byear_x byear_y ;
run;

data matched;
set matched1 - matched4 ;
run;

/*-----
Step #5 open a 2-day window for dates of admission and discharge
-----*/

proc sql noprint;
create table finder_x as select distinct * from x where X_ID not in
(select X_ID from matched);
create table master as select distinct * from Y where Y_ID not in
(select Y_ID from matched);

create table TEMP as select a.*, b.*
from finder_x as a
left join master as b
on a.prov_num = b.prov_num and
    a.gender = b.gender and
    abs(a.adate_x - b.adate_y) < 3 and
    abs(a.ddate_x - b.ddate_y) < 3 and
    a.bdate_x= b.bdate_y and
    a.race_x = b.race_y and
    a.zip_x= b.zip_y
;
quit;

data matched5;
set TEMP;
where missing(Y_ID) = 0 ;
length Matched $120.;
matched = '5 7 factor with 2d win for a/d date' ;
drop adate_x bdate_x ddate_x zip_x race_x
    bday_x bday_y
        bmonth_x bmonth_y
            byear_x byear_y ;
run;

data matched;
set matched1 - matched5 ;
run;

/*-----
Step #6 open a 7-day window for dates of admission and discharge
-----*/

proc sql noprint;

```

```

create table finder_x as select distinct * from x where X_ID not in
(select X_ID from matched);
create table master as select distinct * from Y where Y_ID not in
(select Y_ID from matched);

create table TEMP as select a.*, b.*
from finder_x as a
left join master as b
on a.prov_num = b.prov_num and
   a.gender = b.gender and
   abs(a.adata_x - b.adata_y) < 8 and
   abs(a.ddate_x - b.ddate_y) < 8 and
   a.bdate_x= b.bdate_y and
   a.race_x = b.race_y and
   a.zip_x= b.zip_y
;
quit;

data matched6;
set TEMP;
where missing(Y_ID) = 0 ;
length Matched $120.;
matched = '6 7 factor with 7d win for a/d date' ;
drop adata_x bdate_x ddate_x zip_x race_x
      bday_x bday_y
      bmonth_x bmonth_y
      byear_x byear_y ;
run;

data matched;
set matched1 - matched6 ;
run;

/*-----
Step #7 without zipcode and 1-day window for dates of admission and
discharge
-----*/

proc sql noprint;
create table finder_x as select distinct * from x where X_ID not in
(select X_ID from matched);
create table master as select distinct * from Y where Y_ID not in
(select Y_ID from matched);

create table TEMP as select a.*, b.*
from finder_x as a
left join master as b
on a.prov_num = b.prov_num and
   a.gender = b.gender and
   abs(a.adata_x - b.adata_y) < 2 and
   abs(a.ddate_x - b.ddate_y) < 2 and
   a.bdate_x= b.bdate_y and
   a.race_x = b.race_y

```



```

;
quit;

data matched7;
set TEMP;
where missing(Y_ID) = 0 ;
length Matched $120.;
matched = '7 wo zip and 1d win for a/d date' ;
drop adate_x bdate_x ddate_x zip_x race_x
      bday_x bday_y
          bmonth_x bmonth_y
          byear_x byear_y ;
run;

data matched;
set matched1 - matched7 ;
run;

/*-----
Step #8 without race and 1-day window for dates of admission and
discharge
-----*/

proc sql noprint;
create table finder_x as select distinct * from x where X_ID not in
(select X_ID from matched);
create table master as select distinct * from Y where Y_ID not in
(select Y_ID from matched);

create table TEMP as select a.*, b.*
from finder_x as a
left join master as b
on a.prov_num = b.prov_num and
   a.gender = b.gender and
   abs(a.adata_x - b.adata_y) < 2 and
   abs(a.ddate_x - b.ddate_y) < 2 and
   a.bdate_x= b.bdate_y and
   a.zip_x= b.zip_y
;
quit;

data matched8;
set TEMP;
where missing(Y_ID) = 0 ;
length Matched $120.;
matched = '8 wo race and 1d win for a/d date' ;
drop adate_x bdate_x ddate_x zip_x race_x
      bday_x bday_y
          bmonth_x bmonth_y
          byear_x byear_y ;
run;

data matched;

```

```

set matched1 = matched8 ;
run;

/*-----
Step #9 without race, zip, and 1-day window for dates of admission
and discharge
-----*/

proc sql noprint;
create table finder_x as select distinct * from x where X_ID not in
(select X_ID from matched);
create table master as select distinct * from Y where Y_ID not in
(select Y_ID from matched);

create table TEMP as select a.*, b.*
from finder_x as a
left join master as b
on a.prov_num = b.prov_num and
a.gender = b.gender and
abs(a.adate_x - b.adate_y) < 2 and
abs(a.ddate_x - b.ddate_y) < 2 and
a.bdate_x = b.bdate_y
;
quit;

data matched9;
set TEMP;
where missing(Y_ID) = 0 ;
length Matched $120.;
matched = '9 wo race/zip and allow 1d win for a/d date' ;
drop adate_x bdate_x ddate_x zip_x race_x
bday_x bday_y
bmonth_x bmonth_y
byear_x byear_y ;
run;

data matched;
set matched1 = matched9 ;
run;

/*-----
Step #10 without race, zip, discharge
-----*/

proc sql noprint;
create table finder_x as select distinct * from x where X_ID not in
(select X_ID from matched);
create table master as select distinct * from Y where Y_ID not in
(select Y_ID from matched);

create table TEMP as select a.*, b.*
from finder_x as a
left join master as b

```

```

on a.prov_num = b.prov_num and
  a.gender = b.gender and
  a.adate_x = b.adate_y and
  a.bdate_x= b.bdate_y
;
quit;

data matched10;
set TEMP;
where missing(Y_ID) = 0 ;
length Matched $120.;
matched = '10 wo race zip discharge date' ;
drop adate_x bdate_x ddate_x zip_x race_x
      bday_x bday_y
      bmonth_x bmonth_y
      byear_x byear_y ;
run;

data matched;
set matched1 - matched10 ;
run;

/*-----
Step #11 without race, zip, admission
-----*/

proc sql noprint;
create table finder_x as select distinct * from x where X_ID not in
(select X_ID from matched);
create table master as select distinct * from Y where Y_ID not in
(select Y_ID from matched);

create table TEMP as select a.*, b.*
from finder_x as a
left join master as b
on a.prov_num = b.prov_num and
  a.gender = b.gender and
  a.ddate_x = b.ddate_y and
  a.bdate_x= b.bdate_y
;
quit;

data matched11;
set TEMP;
where missing(Y_ID) = 0 ;
length Matched $120.;
matched = '11 wo race zip admission date' ;
drop adate_x bdate_x ddate_x zip_x race_x
      bday_x bday_y
      bmonth_x bmonth_y
      byear_x byear_y ;
run;

```

```

data matched;
set matched1 - matched11 ;
run;

/*-----
Step #12 without race, zip, 2 out of 3 dob
-----*/
proc sql noprint;
create table finder_x as select distinct * from x where X_ID not in
(select X_ID from matched);
create table master as select distinct * from Y where Y_ID not in
(select Y_ID from matched);

create table TEMP as select a.*, b.*
from finder_x as a
left join master as b
on a.prov_num = b.prov_num and
a.gender = b.gender and
a.ddate_x = b.ddate_y and
a.adata_x = b.adata_y and
((a.bday_x = b.bday_y and a.bmonth_x = b.bmonth_y) or (a.bday_x =
b.bday_y and a.byear_x = b.byear_y) or ( a.bmonth_x = b.bmonth_y and
a.byear_x = b.byear_y))
;
quit;

data matched12;
set TEMP;
where missing(Y_ID) = 0 ;
length Matched $120.;
matched = '12 wo race zip and 2/3 element of dob' ;
drop adate_x bdate_x ddate_x zip_x race_x
bday_x bday_y
bmonth_x bmonth_y
byear_x byear_y ;
run;

data matched;
set matched1 - matched12 ;
run;

/*-----
Step #13 without race, zip, 2 out of 3 dob, 1d win for a/d date
-----*/
proc sql noprint;
create table finder_x as select distinct * from x where X_ID not in
(select X_ID from matched);
create table master as select distinct * from Y where Y_ID not in
(select Y_ID from matched);

create table TEMP as select a.*, b.*

```

```

from finder_x as a
left join master as b
on a.prov_num = b.prov_num and
   a.gender = b.gender and
   abs(a.ddate_x - b.ddate_y) <1 and
   abs(a.adata_x - b.adata_y) <1 and
   ((a.bday_x = b.bday_y and a.bmonth_x = b.bmonth_y) or (a.bday_x =
b.bday_y and a.byear_x = b.byear_y) or ( a.bmonth_x = b.bmonth_y and
a.byear_x = b.byear_y))
;
quit;

data matched13;
set TEMP;
where missing(Y_ID) = 0 ;
length Matched $120.;
matched = '13 wo race zip and 2/3 element of dob, 1d win' ;
drop adate_x bdate_x ddate_x zip_x race_x
      bday_x bday_y
      bmonth_x bmonth_y
      byear_x byear_y ;
run;

data final_matched;
set matched1 - matched13 ;
run;

```
